# Supplementary material for: ZnGeN2 and ZnGeN2:Mn2+ phosphors: hydrothermal-ammonolysis synthesis, structure and luminescence properties
Source: Royal Society of Chemistry journal article supplement (doi:10.1039/c5tc01864a), 2015-01-01
Supplement: c5tc01864a1.pdf [file c5tc01864a1.pdf]

### Electronic Supplementary Information (ESI)

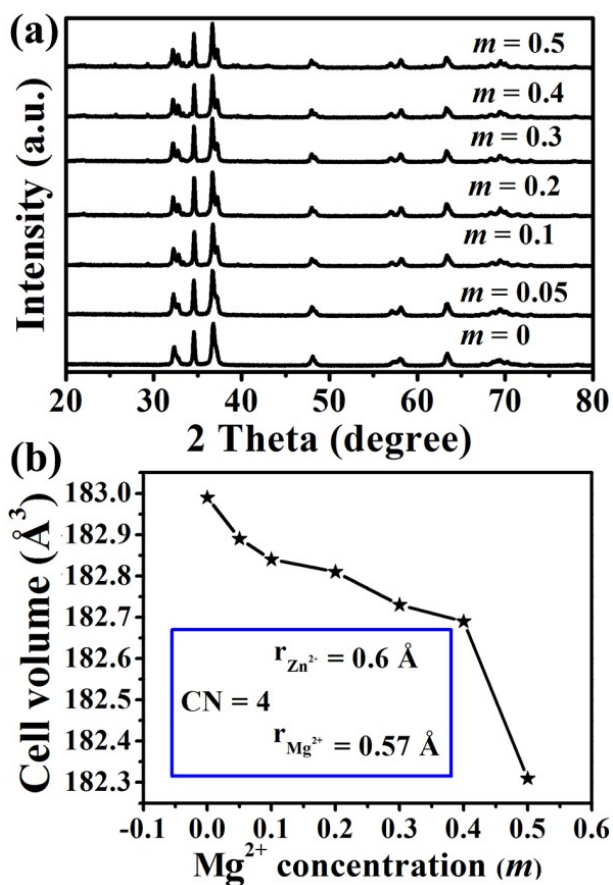

**Figure S1** (a) XRD patterns of  $\text{Zn}_{1-m}\text{Mg}_m\text{GeN}_2:0.02\text{Mn}^{2+}$ ; (b) cell volume variation with  $\text{Mg}^{2+}$  concentration in  $\text{Zn}_{1-m}\text{Mg}_m\text{GeN}_2:0.02\text{Mn}^{2+}$ .

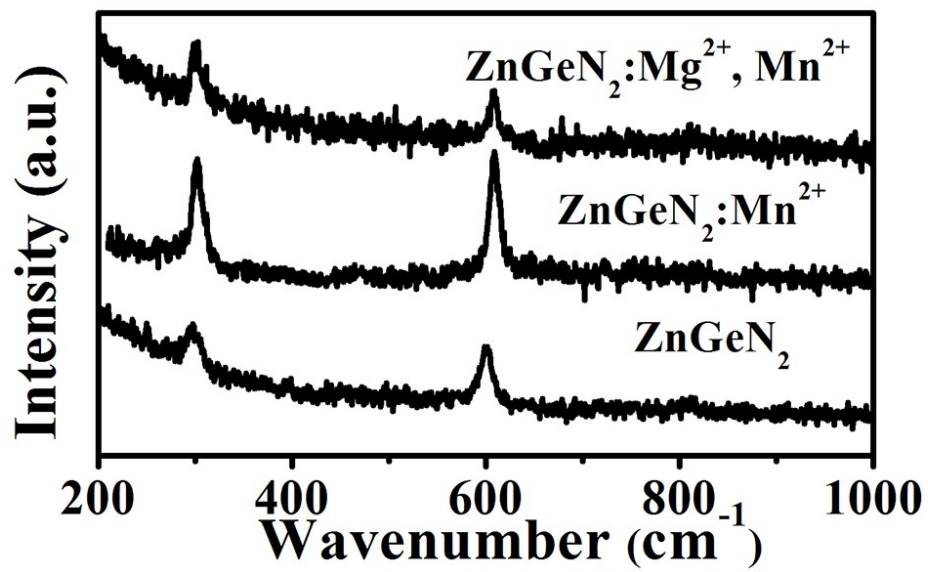

**Figure S2** Raman spectra of ZnGeN<sub>2</sub>, ZnGeN<sub>2</sub>: Mn<sup>2+</sup>, and ZnGeN<sub>2</sub>:Mg<sup>2+</sup>, Mn<sup>2+</sup>.

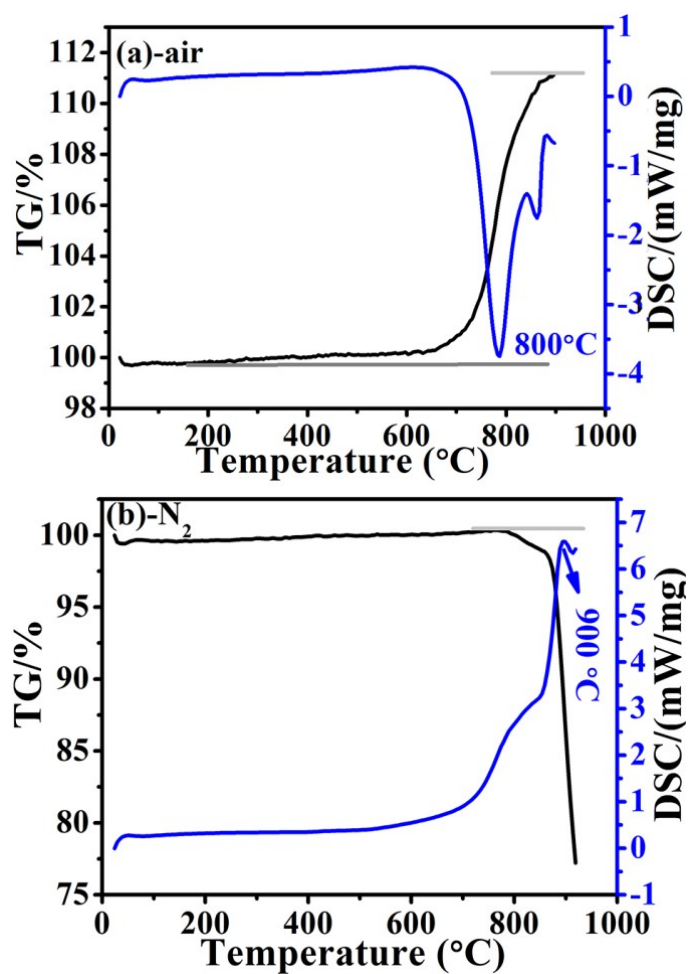

**Figure S3** TG-DSC curves of the ZnGeN<sub>2</sub> sample in air (a) and N<sub>2</sub> (b) atmospheres.

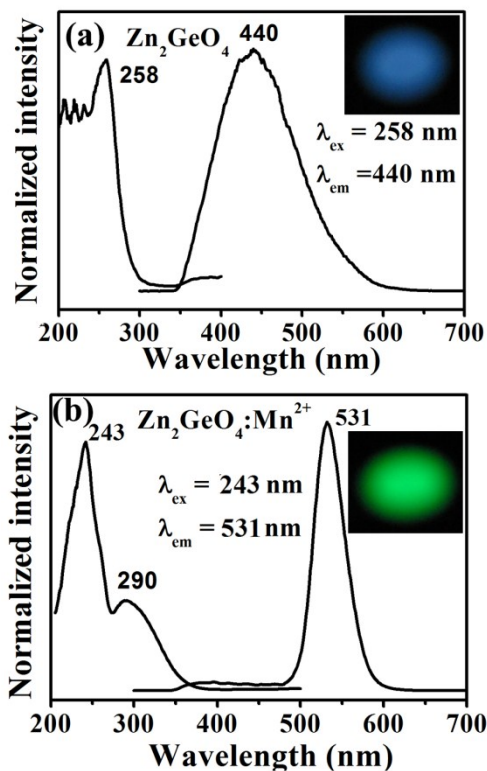

**Figure S4** Photoluminescence excitation and emission spectra of hydrothermal product (a)  $\text{Zn}_2\text{GeO}_4$  sample and (b)  $\text{Zn}_2\text{GeO}_4:\text{Mn}^{2+}$  sample. The inset photographs represent the luminescence photographs of  $\text{Zn}_2\text{GeO}_4$  and  $\text{Zn}_2\text{GeO}_4:\text{Mn}^{2+}$  samples under UV lamp (254 nm) irradiation.

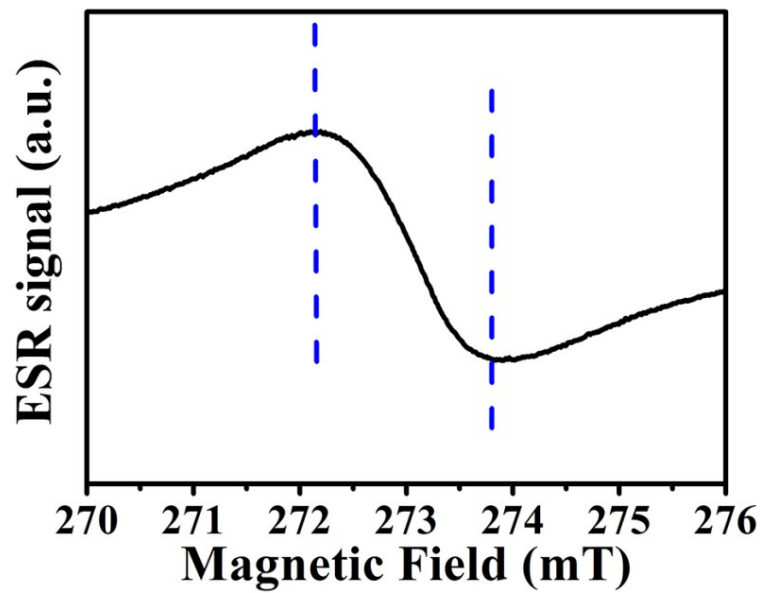

**Figure S5** ESR spectrum of ZnGeN<sub>2</sub>:Mn<sup>2+</sup> phosphor measured at 300 K.

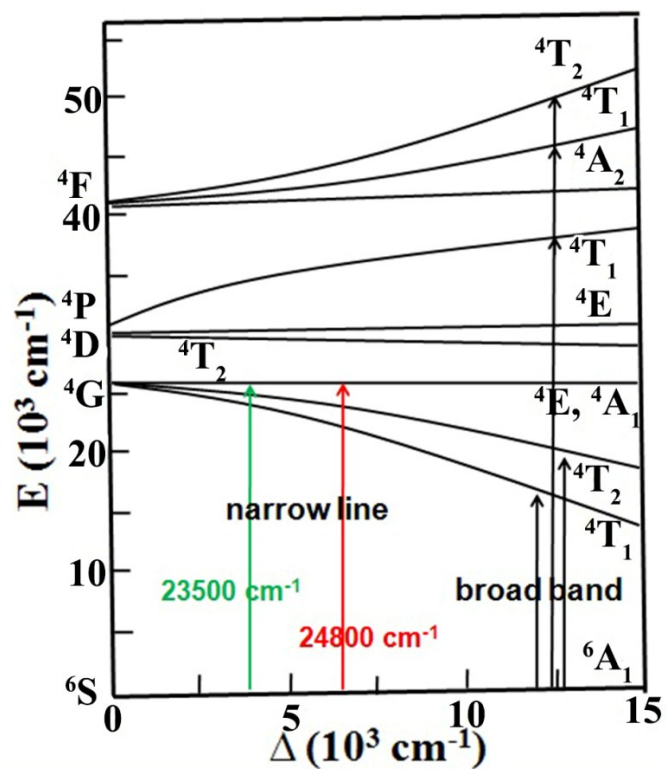

Figure S6 Tanabe–Sugano energy-level diagram for Mn<sup>2+</sup>.

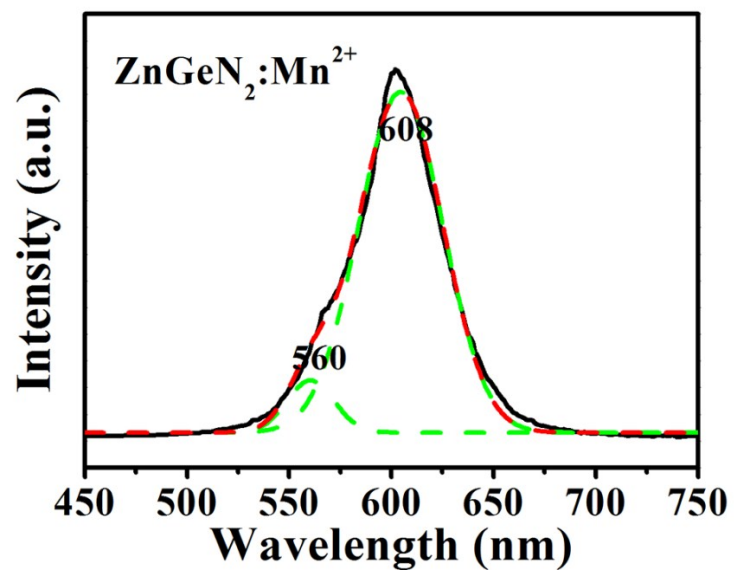

**Figure S7** Observed (solid) and Gaussian fitting (dashed) emission spectrum for ZnGeN<sub>2</sub>:Mn<sup>2+</sup>.

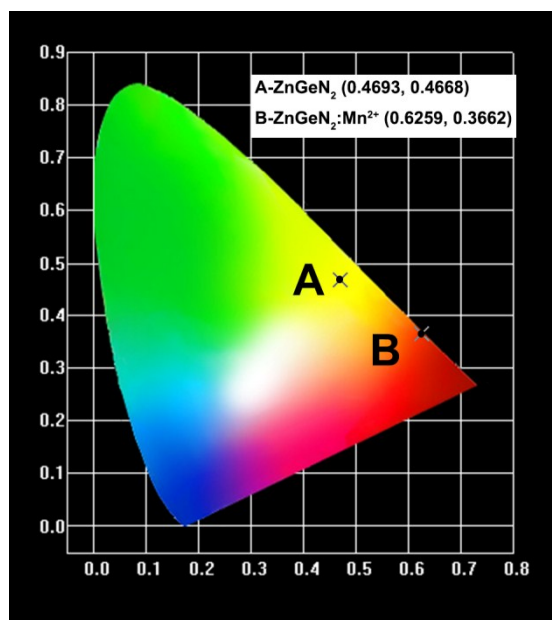

**Figure S8** The CIE chromaticity diagram for ZnGeN<sub>2</sub> (A) and ZnGeN<sub>2</sub>:Mn<sup>2+</sup> (B) samples under 340 nm UV light excitation.



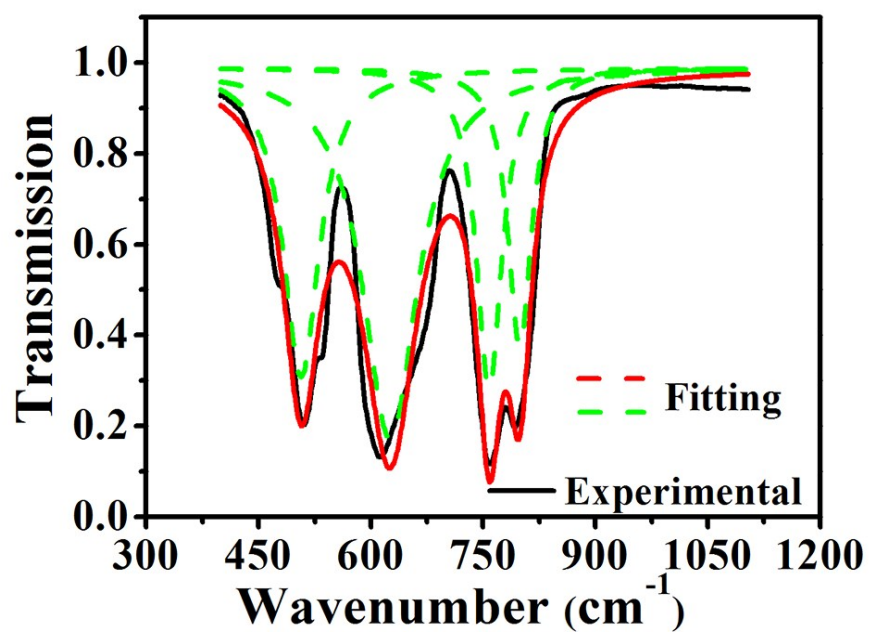

**Figure S9** Experimental and Lorentz fitting infrared spectra of ZnGeN<sub>2</sub>.

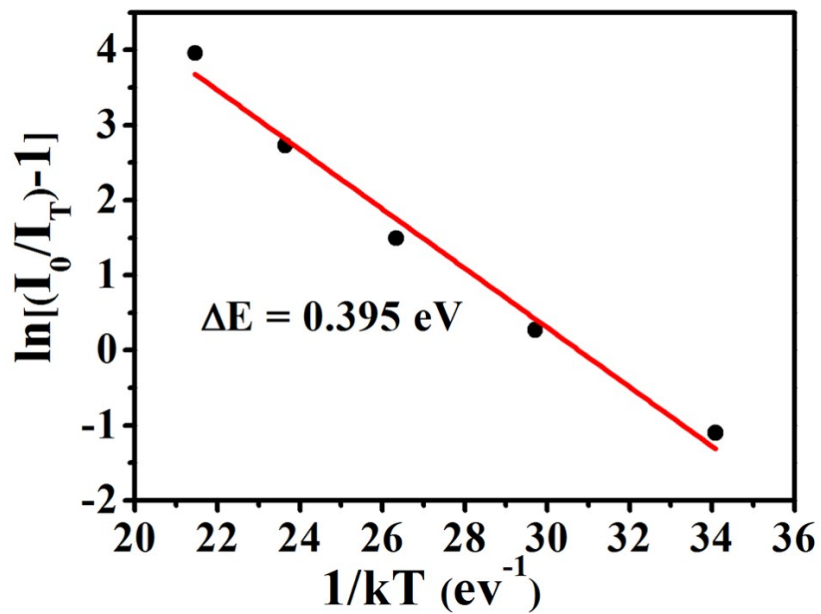

**Figure S10** The plot of  $\ln(I_0/I_T-1)$  vs.  $1/kT$  of the  $\text{ZnGeN}_2:\text{Mn}^{2+}$  phosphors.

**Table S1** The fitting parameters for the IR-active modes of ZnGeN<sub>2</sub>.

| $\omega_j(\text{cm}^{-1})$ | 506  | 625  | 758  | 798  |                       |
|----------------------------|------|------|------|------|-----------------------|
| $S$                        | 0.68 | 0.82 | 0.71 | 0.61 | $\varepsilon_0 = 1.2$ |
| $\gamma$                   | 59   | 88   | 41   | 38   |                       |
